# Supplementary material for: Tensions at the boundary: Rearticulating ‘organic’ plant breeding in the age of gene editing
Source: Oxford University Press journal article supplement (doi:10.1525/elementa.429), 2020-01-01
Supplement: elementa-8-429-s1.xlsx [file elementa-8-429-s1.xlsx]

## Sheet: Title
Supplemental material
Tensions at the boundary: Rearticulating ‘organic’ plant breeding in the age of gene editing
Sara Nawaz¹*, Susanna Klassen¹,², Alexandra Lyon²
¹Institute for Resources, Environment and Sustainability, The University of British Columbia, British Columbia, Canada
²Centre for Sustainable Food Systems, The University of British Columbia, British Columbia, Canada
*sara.a.nawaz@gmail.com

## Sheet: Table
Organization Name	Title	Publication Type	Topic/Content	Technology	Geographic focus	Organic? (Y/N)	Boundary org?	Date	Logics of opposition used	Should gene editing be regulated as GM?	Link to document/ statement	Notes
Canada General Standards Board (CGSB)	National Standard of Canada: Canadian General Standards Board - Organic production systems General principles and management standards	Legal standard	Organic sector standards	New gene editing techniques, other breeding technologies	Canada	Yes	No	2018-03-01	Naturalness	Yes	http://publications.gc.ca/collections/collection_2018/ongc-cgsb/P29-32-310-2018-eng.pdf	Definition is currently under revision.
Canadian Biotechnology Action Network (CBAN)	Intro to Gene "Editing": The New Genetic Engineering	Leaflet	Regulation	New gene editing techniques	Canada	No	Yes	2019-01-01	Uncertainty; Environmental risk; Food safety; Impact on non-target organisms; Reverence for all organisms	Yes	https://cban.ca/wp-content/uploads/Intro-to-Gene-Editing-2019.pdf
Center for Food Safety	Comment: Genome Editing in New Plant Varieties Used for Foods	Public comment	Labeling; Regulation	New gene editing techniques	US	No	Yes	2017-06-27	Environmental risk; Food safety; Right to know; Seed sovereignty; Contamination; Precautionary principle	Yes	https://www.regulations.gov/document?D=FDA-2016-N-4389-0572
Friends of the Earth	Comment: Genome Editing in New Plant Varieties Used for Foods	Public comment	Labeling; Regulation	New gene editing techniques	US	No	Yes	2017-06-27	Environmental risk; Food Safety; Right to know; Seed sovereignty; Contamination; Precautionary principle	Yes	https://www.regulations.gov/document?D=FDA-2016-N-4389-0526
Cornucopia Institute	GMO-Friendly USDA Ogling Organic	Web page	Gene editing in organic	New gene editing techniques	US	Yes	Yes	2019-07-01	Corporate control; Contesting necessity; Organic integrity	Unclear. Not explicitly stated, but likely yes	https://www.cornucopia.org/2019/07/gmo-usda-ogling-organic/
Friends of the Earth & the ETC Group	GMOs 2.0: Synthetic Biology A guide to protecting natural products	Position paper	Consumer awareness; Regulation	New gene editing techniques	North America	No	Yes	2017-12-01	Corporate control; Human health risks; Naturalness; Uncertainty; Environmental risk; Impact to farmer livelihoods; Food safety	Yes	https://1bps6437gg8c169i0y1drtgz-wpengine.netdna-ssl.com/wp-content/uploads/2017/12/SynbioFreeCompanyGuide.pdf
IFOAM	Compatability of Breeding Techniques in Organic Systems	Position Paper	Consumer awareness; Gene editing in organic; Labeling; Regulation	New gene editing techniques; other breeding techniques	International	yes	Yes	2017	Right to know; intellectual property; Impact to farmer livelihoods	Yes	https://orgprints.org/33683/1/ifoam-2017-PlantBreeding-techniques-position_paper.pdf
National Organic Coalition (NOC)	Gene Editing is Prohibited in Organic	Position statement	Gene editing in organic	New gene editing techniques	US	yes	Yes	2019-10-01	Consumer desires; Contesting necessity; Not a panacea	Yes. They support the NOSB recommendations and oppose all forms of gene editing in organics	https://www.nationalorganiccoalition.org/blog/2019/10/1/gene-editing-is-prohibited-in-organic
National Organic Coalition (NOC)	NOC Comments to the National Organic Standards Board	Public comment	Gene editing in organic	New gene editing techniques	US	Yes	Yes	October 23-25, 2019	Consumer desires; Contesting necessity; Not a panacea	Yes	https://www.pccmarkets.com/wp-content/uploads/2019/10/NOSB-Fall-2019-NOC-Comments-2019.10.03.pdf
National Organic Standards Board (NOSB)	NOSB Materials/GMO Subcommittee Proposal Excluded Method Determinations	Article	Gene editing in organic; Organic standards	New gene editing techniques; Other breeding technologies	US	yes	Yes	2019-10-01	Naturalness; impact on non-target organisms; organic integrity	Yes. Statement gives a list of new technologies and states which are excluded or not. Marker-assisted breeding, transduction, and embryo rescue in plants were NOT excluded.	https://www.ams.usda.gov/sites/default/files/media/AllNOSBproposalPacket.pdf
Organic Farmers Association (OFA)	Letter to Secretary Perdue concerning the comment of Under Secretary Greg Ibach	Public comment	Gene editing in organic; Organic standards	New gene editing techniques	US	Yes	Yes	2019-09-01	Consumer desires; Contesting necessity; Distraction from core issues	Yes. "All forms of genetic engineering should remain excluded methods under the [USDA] National Organic Program"	http://organicfarmersassociation.org/news/letter-to-secretary-perdue-concerning-the-comment-of-under-secretary-greg-ibach/	Letter was in response to comment by Under Secretary Greg Ibach during the House Committee on Agriculture Subcommittee on Biotechnology, Horticulture, and Research hearing on July 17, 2019
Cornucopia Institute	Sign On: No GMOs in Organic!	Petition	Organic standards	New gene editing techniques	US	Yes	Yes	2019-12-16	Consumer desires	Yes	https://www.cornucopia.org/action-alerts/no-gmos-in-organic/
Organic Federation of Canada (OfC)	The Review of the Canadian Standards	Newsletter	Organic standards	New gene editign techniques; other breeding technologies	Canada	Yes	Yes	2019-02-18	[not provided]	Yes, but livestock vaccines developed using genetic engineering are acceptable	http://organicfederation.ca/sites/documents/190213%20Review%20status%20Feb19nb%20ENG.docx_.pdf
Organic Seed Alliance	Email to National Organic Standards Board: "RE: Materials/GMO Subcommittee Discussion Document: Induced Mutagenesis and Embryo Transfer in Livestock" (FROM: Kiki Hubbard)	Public comment	Organic standards	Other breeding technologies	US	Yes	Yes	2019-04-04	Precision is irrelevant	Yes	https://seedalliance.org/wp-content/uploads/2019/05/OSA-NOSB-Induced-Mutagenesis-FINAL.pdf

## Sheet: Categories
Org Type	Publication Type	Topic	Technology	Logics
Organic standards committee	Legal standard	Organic standards	New gene editing techniques	Naturalness
Civil society organization	Web page	Regulation (general)	Other breeding technologies	Uncertainty
Organic association	Position statement	Opposition logics		Environmental risk
Non-profit	Public comment	Gene editing in organic		Human health risk
	Leaflet	Consumer Awareness		Food safety
	Position paper	Labeling		Impact on non-target organisms
	Meeting discussion document			Reverence for all organisms
	Petition			Right to know
	Policy memo			Seed sovereignty
	Newsletter			Contamination
				Risk (general)
				Organic integrity
				Contesting necessity
				Corporate control
				Impact to farmer livelihoods
				Intellectual property
				Consumer desires
				Not a panacea
				Distraction from core issues
				Precision is irrelevant
